# Supplementary material for: Phenotypic Plasticity Conferred by the Metastatic Microenvironment of the Brain Strengthens the Intracranial Tumorigenicity of Lung Tumor Cells
Source: PubMed Central journal article supplement (PMC8155524; doi:10.3389/fonc.2021.637911), 2021-05-13
Supplement: DataSheet_1.pdf [file DataSheet_1.pdf]

## *Supplementary Material*

### **1 Supplementary Figures and Tables**

#### **1.1 Supplementary Figures**

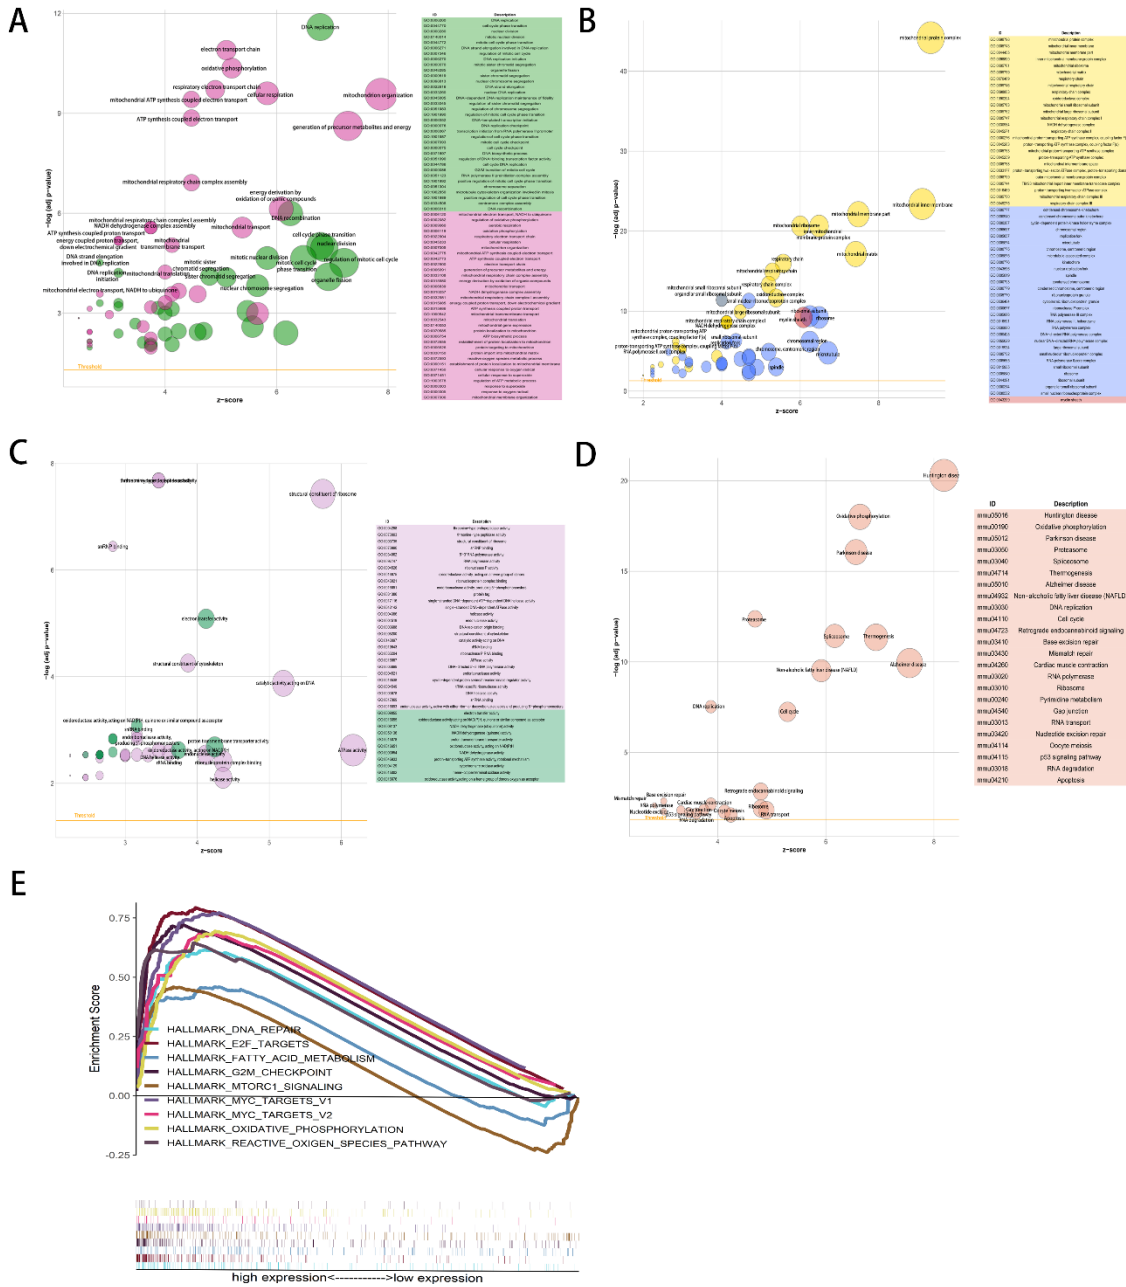

**Supplementary Figure 1.** Enrichment analysis of LLC dataset. GO and KEGG signaling pathways enrichment analysis utilized the upregulated DEGs in LLC DEG set, and GSEA used the whole expressed genes in brain metastatic LLC tumor cells. (A) Enrichment analysis of BP category in GO database with the upregulated DEGs in LLC DEG dataset. (B) Enrichment analysis of CC category. (C) Enrichment analysis of MF category in GO database. (D) Enrichment analysis of signaling pathways in KEGG database. Both *p*- and *q*-values of the factors shown in the plot were less than 0.05. (E) GSEA utilized the HALLMARK gene sets in the MSigDB with the whole expressed genes

in the brain metastatic LLC tumor cells. Only gene sets with  $p$ - and  $q$ -values both less than 0.05 were considered significantly enriched.

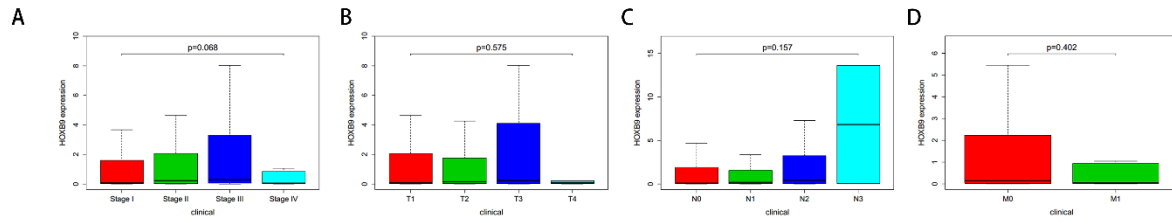

**Supplementary Figure 2.** Correlation analysis of HOXB9 expression with the clinicopathological features of LUAD patients in TCGA database. (A-D) Correlation analysis of HOXB9 expression with the stage and TNM of LUAD patients in TCGA database,  $p = 0.068, 0.575, 0.157,$  and  $0.402,$  respectively.

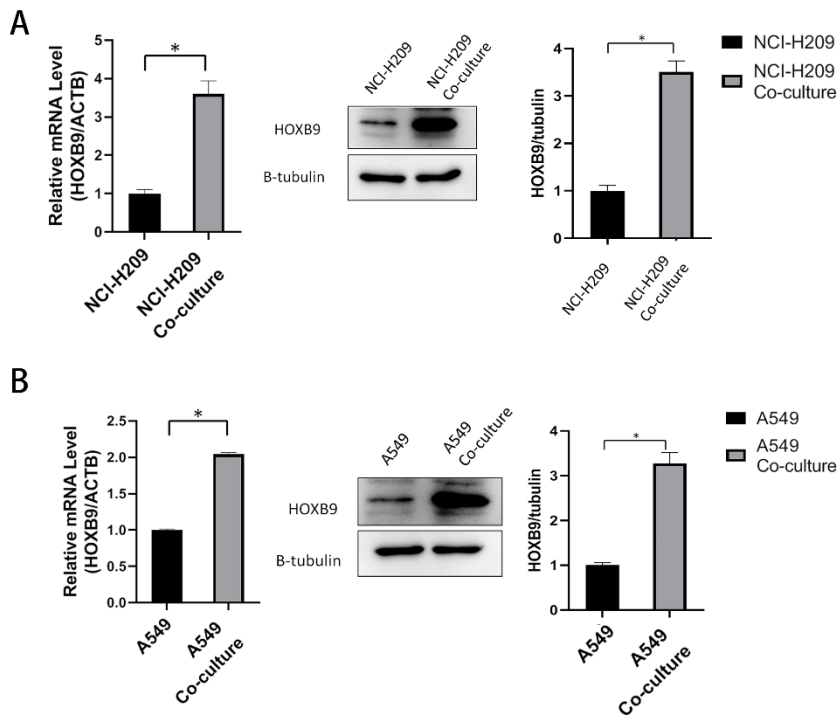

**Supplementary Figure 3.** Upregulation of HOXB9 in NCI-H209 and A549 co-cultured with HBMECs. (A) Upregulation of HOXB9 in the co-cultured NCI-H209 cells determined by real-time PCR and western blot,  $p < 0.05$ . (B) Upregulation of HOXB9 in co-cultured A549 cells validated by real-time PCR and Western blot,  $p < 0.05$ .

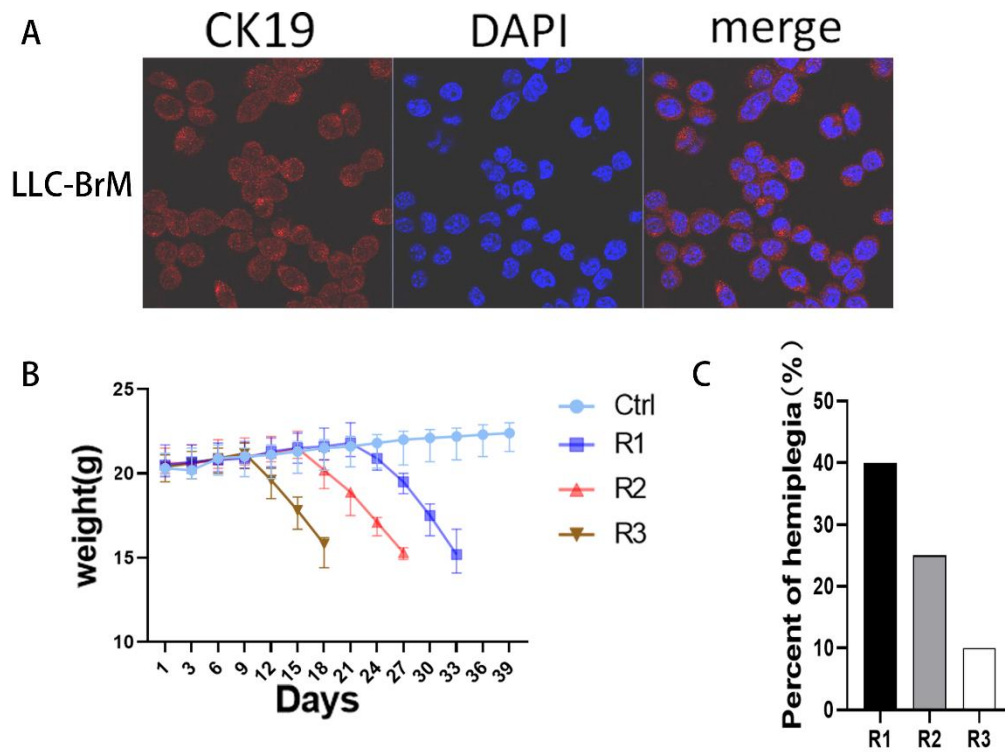

**Supplementary Figure 4.** Recorded physiological features of the model mice and determination of brain metastatic cells of LLC-BrM. (A) Determination of LLC-BrM with the marker of lung tumor cells, CK19. (B) Curves of the decreasing weights of the model mice. R1: mice in the first round of modeling; R2: mice in the second round of modeling; R3: experimental mice in the third round of modeling; Ctrl: the control group. (C) Record of hemiplegia percentage of the modeling mice in the three rounds of modeling.

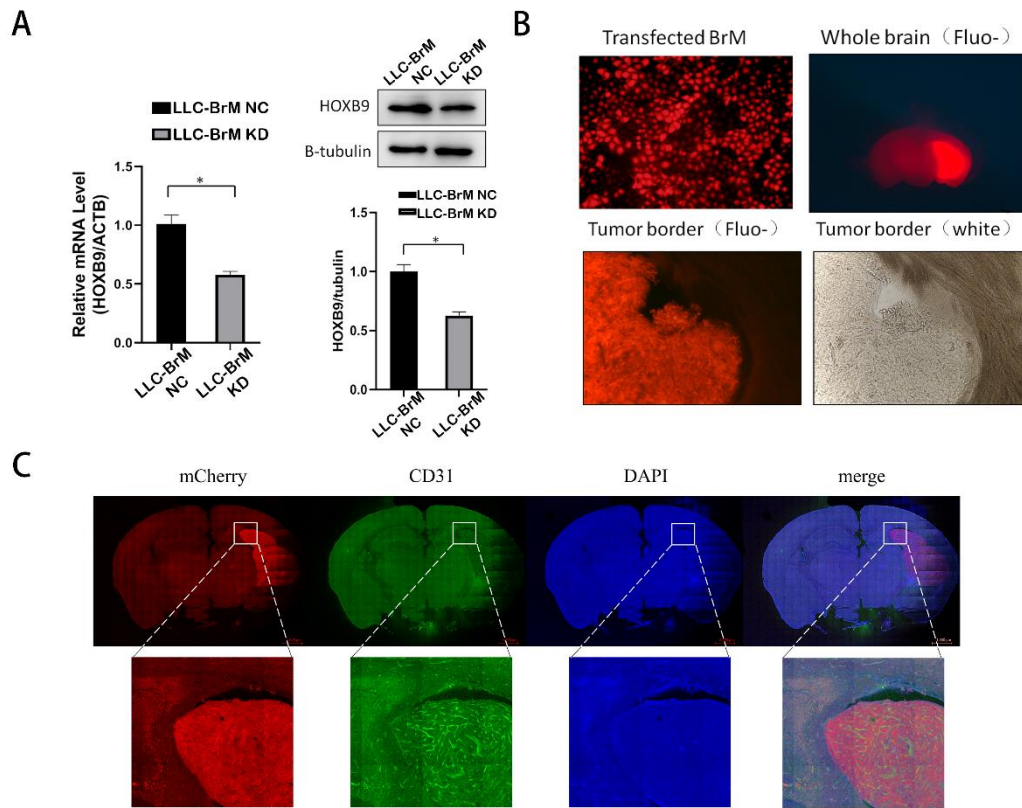

**Supplementary Figure 5.** Determination of HOXB9 expression knockdown and the brain metastases. (A) Determination of HOXB9 expression knockdown by real-time PCR and Western blot,  $*p < 0.05$ . (B) Determination of intracranial metastases by fluorescence microscope. (C) Determination of the brain metastases by two-photon scanning microscope.

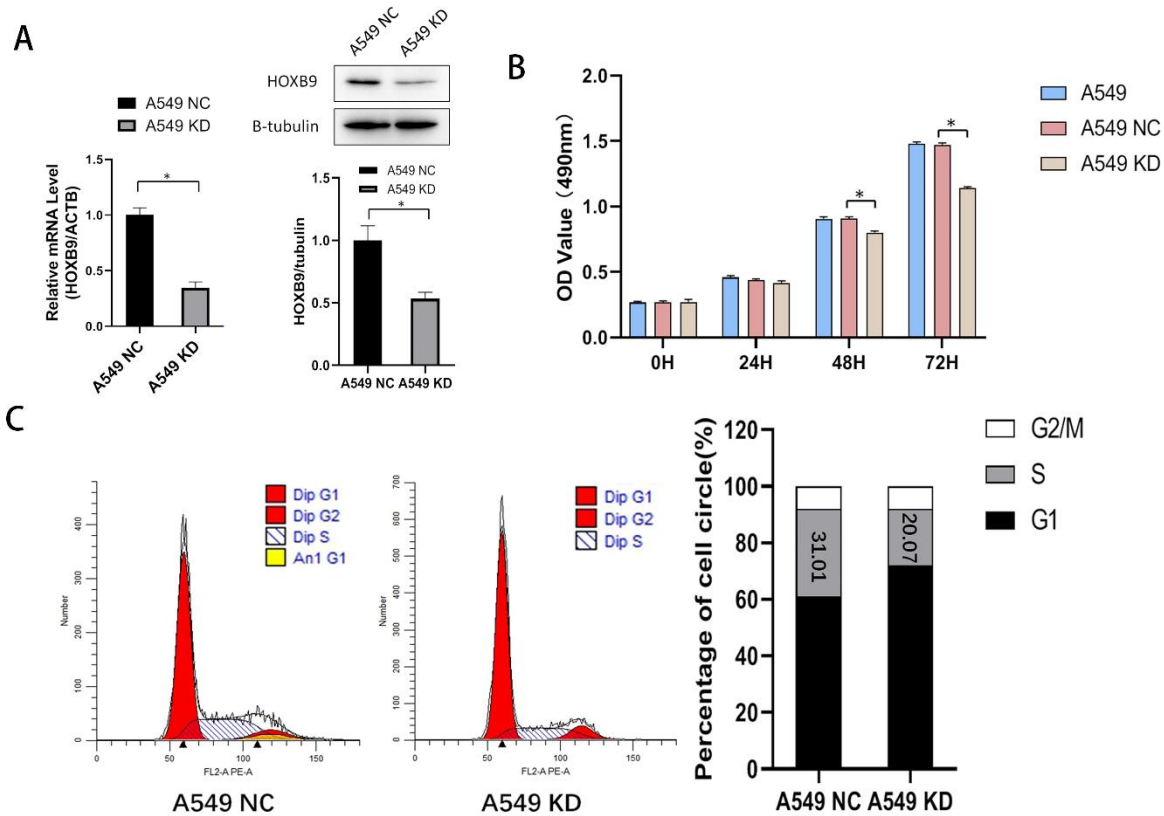

**Supplementary Figure 6.** Downregulation of HOXB9 induced the decreasing of the proliferation and S phase proportion of A549 tumor cells. (A) Determination of the HOXB9 expression knockdown by real-time PCR and Western blot,  $*p < 0.05$ . (B) Cell viability analysis of A549 cells with HOXB9 knockdown,  $*p < 0.05$ . (C) Flowcytometry analysis of the cell cycle of A549 cells with HOXB9 expression knockdown.

## 1.2 Supplementary Tables

Supplement table 1 : NCI-H209 GSEA

| Gene set name                      | NES      | NOM p-val | FDR q-val |
|------------------------------------|----------|-----------|-----------|
| HALLMARK_HYPOXIA                   | 2.114534 | p<0.001   | p<0.001   |
| HALLMARK_MTORC1_SIGNALING          | 2.049872 | p<0.001   | p<0.001   |
| HALLMARK_TNFA_SIGNALING_VIA_NFKB   | 2.03154  | p<0.001   | p<0.001   |
| HALLMARK_INTERFERON_GAMMA_RESPONSE | 1.963001 | p<0.001   | p<0.001   |
| HALLMARK_INFLAMMATORY_RESPONSE     | 1.941752 | p<0.001   | p<0.001   |
| HALLMARK_GLYCOLYSIS                | 1.935974 | p<0.001   | p<0.001   |
| HALLMARK_IL2_STAT5_SIGNALING       | 1.932123 | p<0.001   | p<0.001   |
| HALLMARK_ANDROGEN_RESPONSE         | 1.887269 | p<0.001   | p<0.001   |
| HALLMARK_INTERFERON_ALPHA_RESPONSE | 1.829837 | p<0.001   | p<0.001   |

Supplement Table 2: PC9 GSEA

| Gene set name                              | NES       | NOM p-val | FDR q-val |
|--------------------------------------------|-----------|-----------|-----------|
| HALLMARK_HYPOXIA                           | 1.7942404 | P<0.01    | P<0.01    |
| HALLMARK_EPITHELIAL_MESENCHYMAL_TRANSITION | 1.678764  | P<0.01    | P<0.01    |
| HALLMARK_APICAL_JUNCTION                   | 1.6677696 | P<0.01    | P<0.01    |
| HALLMARK_TGF_BETA_SIGNALING                | 1.5673499 | 0.013     | 0.0291    |
| HALLMARK_UV_RESPONSE_DN                    | 1.5370948 | 0.007     | 0.0426    |

Supplement Table 3: LLC GSEA

| Gene set name                            | NES      | NOM p-val | FDR q-val |
|------------------------------------------|----------|-----------|-----------|
| HALLMARK_E2F_TARGETS                     | 2.607431 | P<0.01    | P<0.01    |
| HALLMARK_MYC_TARGETS_V1                  | 2.563842 | P<0.01    | P<0.01    |
| HALLMARK_G2M_CHECKPOINT                  | 2.40186  | P<0.01    | P<0.01    |
| HALLMARK_OXIDATIVE_PHOSPHORYLATION       | 2.323324 | P<0.01    | P<0.01    |
| HALLMARK_DNA_REPAIR                      | 1.933659 | P<0.01    | P<0.01    |
| HALLMARK_MYC_TARGETS_V2                  | 1.884524 | P<0.01    | P<0.01    |
| HALLMARK_REACTIVE_OXIGEN_SPECIES_PATHWAY | 1.718278 | P<0.01    | P<0.01    |
| HALLMARK_MTORC1_SIGNALING                | 1.51841  | P<0.01    | P<0.01    |
| HALLMARK_FATTY_ACID_METABOLISM           | 1.491754 | P<0.01    | 0.0198    |

Supplement Table 4. Statistics of the clinicopathological features of LUAD patients from TCGA database.

| Clinical characteristics |            | Total (486) | %    |
|--------------------------|------------|-------------|------|
| Age at diagnosis (y)     | age (<=60) | 155         | 33.2 |
|                          | age (>60)  | 312         | 66.8 |
| Stage                    | I          | 262         | 54.8 |
|                          | II         | 112         | 23.4 |
|                          | III        | 79          | 16.5 |
|                          | IV         | 25          | 5.2  |
| T classification         | T1         | 163         | 33.7 |
|                          | T2         | 260         | 53.8 |
|                          | T3         | 41          | 8.5  |
|                          | T4         | 19          | 3.9  |
| M classification         | M0         | 333         | 93.3 |
|                          | M1         | 24          | 6.7  |
| N classification         | N0         | 312         | 65.8 |
|                          | N1         | 90          | 19   |
|                          | N2         | 70          | 14.8 |
|                          | N3         | 2           | 0.4  |
| Gender                   | Male       | 222         | 45.7 |
|                          | Female     | 264         | 54.3 |

Supplement Table 5: Cell-cycle-associated genes potentially transcribed by HOXB9 (Human)

| symbol                | start | end | score    | strand | BindingSite                                              |
|-----------------------|-------|-----|----------|--------|----------------------------------------------------------|
| WEE2 NM_001105558.1   | 286   | 295 | 0.919998 | -      | TF=HOXB9;class=Homeo domain factors;sequence=GTCATAAAAA  |
| CDC14A XM_017002647.1 | 580   | 589 | 0.908943 | -      | TF=HOXB9;class=Homeo domain factors;sequence=CTCGTAAAAA  |
| CDC14A NM_033313.2    | 499   | 508 | 0.908943 | -      | TF=HOXB9;class=Homeo domain factors;sequence=CTCGTAAAAA  |
| CDC14A NM_001319212.1 | 499   | 508 | 0.908943 | -      | TF=HOXB9;class=Homeo domain factors;sequence=CTCGTAAAAA  |
| CDC14A NM_033312.2    | 499   | 508 | 0.908943 | -      | TF=HOXB9;class=Homeo domain factors;sequence=CTCGTAAAAA  |
| CDC14A NM_003672.3    | 499   | 508 | 0.908943 | -      | TF=HOXB9;class=Homeo domain factors;sequence=CTCGTAAAAA  |
| CDC14A NM_001319210.1 | 499   | 508 | 0.908943 | -      | TF=HOXB9;class=Homeo domain factors;sequence=CTCGTAAAAA  |
| CHEK2 XM_017028561.2  | 791   | 800 | 0.887875 | +      | TF=HOXB9;class=Homeo domain factors;sequence=GTCTAAAAA   |
| ORC3 NM_001197259.1   | 117   | 126 | 0.887573 | +      | TF=HOXB9;class=Homeo domain factors;sequence=GTCTAAAAA   |
| ORC3 NM_012381.3      | 117   | 126 | 0.887573 | +      | TF=HOXB9;class=Homeo domain factors;sequence=GTCTAAAAA   |
| ORC3 NM_181837.2      | 117   | 126 | 0.887573 | +      | TF=HOXB9;class=Homeo domain factors;sequence=GTCTAAAAA   |
| ORC3 XM_011535652.3   | 56    | 65  | 0.887573 | +      | TF=HOXB9;class=Homeo domain factors;sequence=GTCTAAAAA   |
| ORC3 XR_001743295.2   | 56    | 65  | 0.887573 | +      | TF=HOXB9;class=Homeo domain factors;sequence=GTCTAAAAA   |
| ORC3 XR_001743294.2   | 56    | 65  | 0.887573 | +      | TF=HOXB9;class=Homeo domain factors;sequence=GTCTAAAAA   |
| ORC3 XM_017010635.2   | 56    | 65  | 0.887573 | +      | TF=HOXB9;class=Homeo domain factors;sequence=GTCTAAAAA   |
| ORC3 XM_011535651.2   | 56    | 65  | 0.887573 | +      | TF=HOXB9;class=Homeo domain factors;sequence=GTCTAAAAA   |
| ORC3 XM_017010634.2   | 56    | 65  | 0.887573 | +      | TF=HOXB9;class=Homeo domain factors;sequence=GTCTAAAAA   |
| ORC3 XM_005248704.2   | 56    | 65  | 0.887573 | +      | TF=HOXB9;class=Homeo domain factors;sequence=GTCTAAAAA   |
| ORC3 XM_017010633.2   | 56    | 65  | 0.887573 | +      | TF=HOXB9;class=Homeo domain factors;sequence=GTCTAAAAA   |
| ORC3 XM_017010632.2   | 56    | 65  | 0.887573 | +      | TF=HOXB9;class=Homeo domain factors;sequence=GTCTAAAAA   |
| ORC3 XM_017010640.1   | 48    | 57  | 0.887573 | +      | TF=HOXB9;class=Homeo domain factors;sequence=GTCTAAAAA   |
| ORC3 XM_017010637.1   | 48    | 57  | 0.887573 | +      | TF=HOXB9;class=Homeo domain factors;sequence=GTCTAAAAA   |
| ORC3 XM_017010639.1   | 48    | 57  | 0.887573 | +      | TF=HOXB9;class=Homeo domain factors;sequence=GTCTAAAAA   |
| ORC3 XM_005248706.1   | 48    | 57  | 0.887573 | +      | TF=HOXB9;class=Homeo domain factors;sequence=GTCTAAAAA   |
| ORC3 XM_017010636.2   | 43    | 52  | 0.887573 | +      | TF=HOXB9;class=Homeo domain factors;sequence=GTCTAAAAA   |
| ORC3 XM_017010638.2   | 43    | 52  | 0.887573 | +      | TF=HOXB9;class=Homeo domain factors;sequence=GTCTAAAAA   |
| ORC3 XM_005248705.2   | 43    | 52  | 0.887573 | +      | TF=HOXB9;class=Homeo domain factors;sequence=GTCTAAAAA   |
| SMAD3 NM_001145102.1  | 949   | 958 | 0.887573 | -      | TF=HOXB9;class=Homeo domain factors;sequence=GTCTAAAAA   |
| HDAC1 XM_011541309.2  | 715   | 724 | 0.880819 | -      | TF=HOXB9;class=Homeo domain factors;sequence=GTCTGAAAAA  |
| HDAC1 NM_004964.2     | 711   | 720 | 0.880819 | -      | TF=HOXB9;class=Homeo domain factors;sequence=GTCTGAAAAA  |
| CDC14B NR_147239.1    | 81    | 90  | 0.874544 | +      | TF=HOXB9;class=Homeo domain factors;sequence=GTTGTAAAAAT |
| CDC14B NM_033331.3    | 81    | 90  | 0.874544 | +      | TF=HOXB9;class=Homeo domain factors;sequence=GTTGTAAAAAT |
| CDC14B NM_003671.4    | 81    | 90  | 0.874544 | +      | TF=HOXB9;class=Homeo domain factors;sequence=GTTGTAAAAAT |
| CDC14B NM_001351567.1 | 81    | 90  | 0.874544 | +      | TF=HOXB9;class=Homeo domain factors;sequence=GTTGTAAAAAT |
| BUB3 NM_001007793.2   | 969   | 978 | 0.874544 | +      | TF=HOXB9;class=Homeo domain factors;sequence=GTGGTAAAAAT |
| BUB3 NM_004725.3      | 969   | 978 | 0.874544 | +      | TF=HOXB9;class=Homeo domain factors;sequence=GTGGTAAAAAT |



|                       |     |     |          |   |                                                          |
|-----------------------|-----|-----|----------|---|----------------------------------------------------------|
| SMAD3 NM_001145103.1  | 387 | 396 | 0.874544 | - | TF=HOXB9;class=Homeo domain factors;sequence=GTGGTAAAAT  |
| CDC14A NM_033313.2    | 925 | 934 | 0.870194 | + | TF=HOXB9;class=Homeo domain factors;sequence=GTCGTGAAAAG |
| CDC14A NM_001319212.1 | 925 | 934 | 0.870194 | + | TF=HOXB9;class=Homeo domain factors;sequence=GTCGTGAAAAG |
| CDC14A NM_033312.2    | 925 | 934 | 0.870194 | + | TF=HOXB9;class=Homeo domain factors;sequence=GTCGTGAAAAG |
| CDC14A NM_001319210.1 | 925 | 934 | 0.870194 | + | TF=HOXB9;class=Homeo domain factors;sequence=GTCGTGAAAAG |
| CDKN2B NM_078487.2    | 107 | 116 | 0.8650   | - | TF=HOXB9;class=Homeo domain factors;sequence=GTCATTTAAAT |
| CDKN2B NM_004936.3    | 107 | 116 | 0.865018 | - | TF=HOXB9;class=Homeo domain factors;sequence=GTCATTTAAAT |
| CCNB3 XM_017029914.1  | 244 | 253 | 0.864252 | + | TF=HOXB9;class=Homeo domain factors;sequence=ATCATAAAAA  |
| CCNA1 XM_011535295.2  | 86  | 95  | 0.862541 | + | TF=HOXB9;class=Homeo domain factors;sequence=GTCATAAATC  |
| CCNA1 XM_011535294.2  | 86  | 95  | 0.862541 | + | TF=HOXB9;class=Homeo domain factors;sequence=GTCATAAATC  |
| PKMYT1 XM_011522736.3 | 346 | 355 | 0.859748 | - | TF=HOXB9;class=Homeo domain factors;sequence=GTCATAAATA  |
| CDC14A XM_024450506.1 | 500 | 509 | 0.857653 | + | TF=HOXB9;class=Homeo domain factors;sequence=GTGGTAAAAC  |
| SKP1 NM_006930.3      | 536 | 545 | 0.857653 | + | TF=HOXB9;class=Homeo domain factors;sequence=GTAGTAAAAC  |
| SKP1 NM_170679.2      | 536 | 545 | 0.857653 | + | TF=HOXB9;class=Homeo domain factors;sequence=GTAGTAAAAC  |
| CDKN2C NM_001262.2    | 317 | 326 | 0.855605 | + | TF=HOXB9;class=Homeo domain factors;sequence=TTCATAAAAT  |
| CDC20 NM_001255.2     | 1   | 10  | 0.853627 | - | TF=HOXB9;class=Homeo domain factors;sequence=ATCATAAAAG  |
| E2F3 XM_005248865.5   | 550 | 559 | 0.851812 | - | TF=HOXB9;class=Homeo domain factors;sequence=ATCCTAAAAT  |
| E2F3 NM_001243076.2   | 487 | 496 | 0.851812 | - | TF=HOXB9;class=Homeo domain factors;sequence=ATCCTAAAAT  |
| RAD21 NM_006265.2     | 259 | 268 | 0.851812 | - | TF=HOXB9;class=Homeo domain factors;sequence=ATCCTAAAAT  |
| RAD21 NM_006265.2     | 506 | 515 | 0.85151  | - | TF=HOXB9;class=Homeo domain factors;sequence=ATCCTAAAAT  |
| CDC16 XM_017020833.1  | 14  | 23  | 0.85151  | + | TF=HOXB9;class=Homeo domain factors;sequence=ATCCTAAAAT  |
| DBF4 NM_001318061.1   | 8   | 17  | 0.851262 | + | TF=HOXB9;class=Homeo domain factors;sequence=GTCATAAACA  |
| DBF4 NM_001318060.1   | 8   | 17  | 0.851262 | + | TF=HOXB9;class=Homeo domain factors;sequence=GTCATAAACA  |
| DBF4 NM_001318062.1   | 8   | 17  | 0.851262 | + | TF=HOXB9;class=Homeo domain factors;sequence=GTCATAAACA  |
| DBF4 NM_006716.3      | 8   | 17  | 0.851262 | + | TF=HOXB9;class=Homeo domain factors;sequence=GTCATAAACA  |

Only the genes with score larger than 0.85 were listed in the table.

Supplement Table 6 : cell-cycle-associated genes potentially transcribed by Hoxb9 (Mouse)

| symbol                | start | end | score    | strand | BindingSite                                                |
|-----------------------|-------|-----|----------|--------|------------------------------------------------------------|
| Ywhab NM_018753.6     | 247   | 262 | 0.874794 | +      | TF=Hoxb9;class=Helix-Turn-Helix;sequence=GTAGTAATAAAATTTA  |
| Stag1 XM_017313258.1  | 550   | 565 | 0.866441 | +      | TF=Hoxb9;class=Helix-Turn-Helix;sequence=ATAGTCATAAAAAAGG  |
| Cdc20 NM_023223.2     | 10    | 25  | 0.866358 | -      | TF=Hoxb9;class=Helix-Turn-Helix;sequence=AAGGTCATAAAAAAGAG |
| Pttg1 NM_013917.2     | 286   | 301 | 0.861438 | +      | TF=Hoxb9;class=Helix-Turn-Helix;sequence=AAAACCATAAAAGTGA  |
| Pttg1 NM_001131054.1  | 553   | 568 | 0.861438 | +      | TF=Hoxb9;class=Helix-Turn-Helix;sequence=AAAACCATAAAAGTGA  |
| Pttg1 XM_006533515.3  | 502   | 517 | 0.861438 | +      | TF=Hoxb9;class=Helix-Turn-Helix;sequence=AAAACCATAAAAGTGA  |
| Pttg1 XM_006533516.3  | 515   | 530 | 0.861438 | +      | TF=Hoxb9;class=Helix-Turn-Helix;sequence=AAAACCATAAAAGTGA  |
| Stag2 XM_011250984.2  | 217   | 232 | 0.860114 | -      | TF=Hoxb9;class=Helix-Turn-Helix;sequence=TGATCCATAAAAAATGT |
| Stag2 NM_001077712.2  | 124   | 139 | 0.860114 | -      | TF=Hoxb9;class=Helix-Turn-Helix;sequence=TGATCCATAAAAAATGT |
| Cdc14a XM_017319563.1 | 941   | 956 | 0.859751 | +      | TF=Hoxb9;class=Helix-Turn-Helix;sequence=AAACTCATAAAATACC  |
| Ccnd3 NM_007632.2     | 709   | 724 | 0.857922 | +      | TF=Hoxb9;class=Helix-Turn-Helix;sequence=AGAGCAATGAAATATG  |

|                       |     |     |          |   |                                                           |
|-----------------------|-----|-----|----------|---|-----------------------------------------------------------|
| Cdk2 NM_183417.3      | 132 | 147 | 0.855958 | + | TF=Hoxb9;class=Helix-Turn-Helix;sequence=CCAGCAATAAAACAAC |
| Cdk2 NM_016756.4      | 132 | 147 | 0.855958 | + | TF=Hoxb9;class=Helix-Turn-Helix;sequence=CCAGCAATAAAACAAC |
| Bub1b XM_006498622.3  | 196 | 211 | 0.853704 | - | TF=Hoxb9;class=Helix-Turn-Helix;sequence=CAGGCTATAAAAATAA |
| Bub1b NM_009773.3     | 187 | 202 | 0.853704 | - | TF=Hoxb9;class=Helix-Turn-Helix;sequence=CAGGCTATAAAAATAA |
| Cdc14b XM_006517227.3 | 356 | 371 | 0.850623 | + | TF=Hoxb9;class=Helix-Turn-Helix;sequence=AAAGCTATAAAAAGGC |
| Cdc14b XR_873438.2    | 356 | 371 | 0.850623 | + | TF=Hoxb9;class=Helix-Turn-Helix;sequence=AAAGCTATAAAAAGGC |

Only gene with score larger than 0.85 were listed in the table.
